# Supplementary material for: Long non-coding RNA TUG1 promotes endometrial cancer development via inhibiting miR-299 and miR-34a-5p
Source: PubMed Central journal article supplement (PMC5458215; doi:10.18632/oncotarget.15607), 2017-02-22
Supplement: oncotarget-08-31386-s001.pdf [file oncotarget-08-31386-s001.pdf]

## Long non-coding RNA TUG1 promotes endometrial cancer development via inhibiting miR-299 and miR-34a-5p

### SUPPLEMENTARY FIGURE

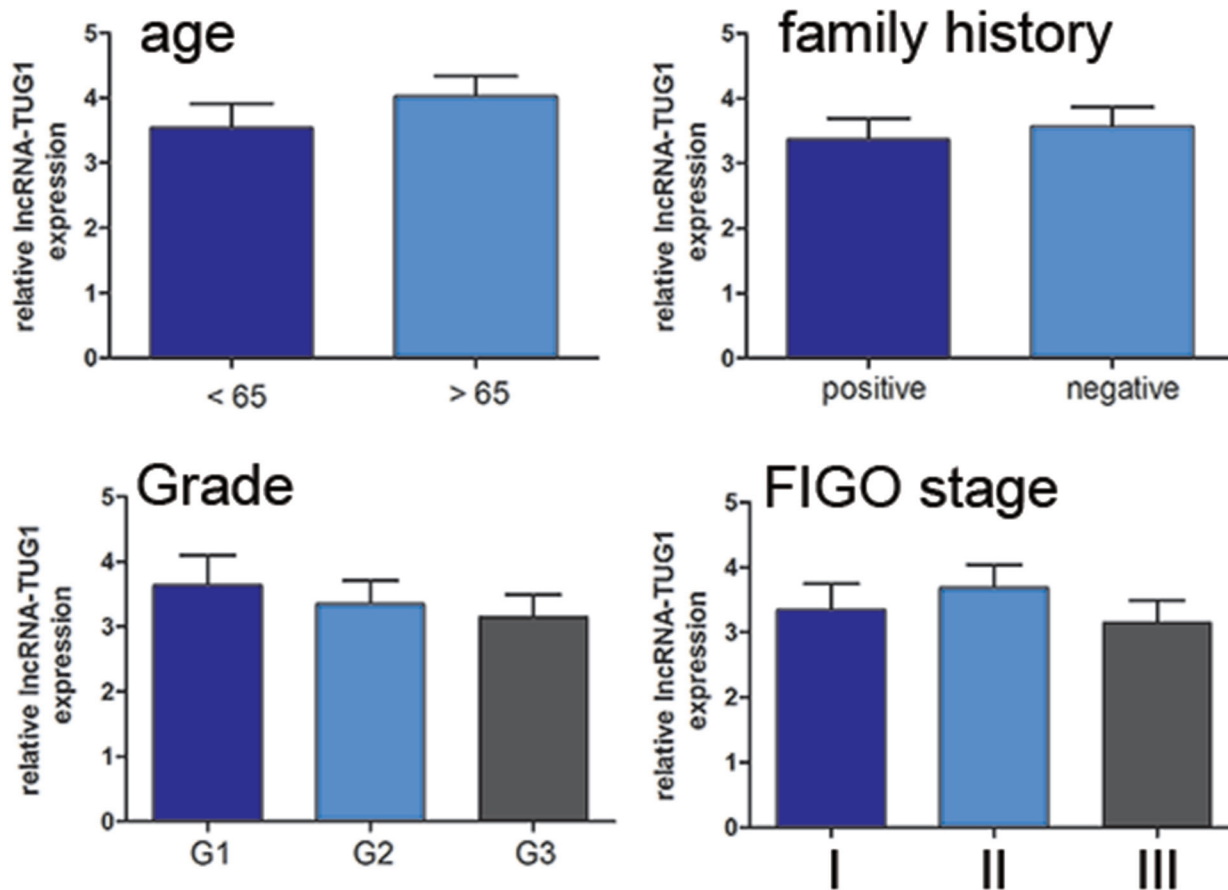

**Supplementary Figure 1: IncRNA-TUG1 expression in subgroups of patients.** (A, B, C, D) Stratification analysis of the IncRNA-TUG1 expression in subgroups of patients, there is no significance differential expression in age, family history, and grade and FIGO stage subgroups.
